# Supplementary material for: Aqueous rechargeable ammonium ion batteries based on MoS2/MXene with a ball-flower morphology as an anode and NH4V4O10 with a layered structure as a cathode
Source: Royal Society of Chemistry journal article supplement (doi:10.1039/d3dt00218g), 2023-01-01
Supplement: d3dt00218g1.pdf [file d3dt00218g1.pdf]

## Supporting Information

### **Aqueous rechargeable ammonium ion battery based on the MoS<sub>2</sub>/MXene with ball-flower morphology as anode and NH<sub>4</sub>V<sub>4</sub>O<sub>10</sub> with layered structure as cathode**

Xue Bai<sup>[a]</sup>, Jiahua Yang<sup>[a]</sup>, Fengying Zhang<sup>[a]</sup>, Zhuwu Jiang<sup>[a]\*</sup>, Fengyi Sun<sup>[a]</sup>, Chuntao Pan<sup>[a]</sup>, Hongcheng Di<sup>[a]</sup>, Shining Ru<sup>[a]</sup>, Dongqi Liao<sup>[a]</sup>, Hongyu Zhang<sup>[a]\*</sup>

*a. College of Ecological Environment and Urban Construction, Fujian University of Technology,*

*Xuefu South Road, No.33, University New District, Fuzhou 350108, Fujian, P.R. China*

Supporting Information consists of six figure and one Table over nine pages, which are Fig. S1 about the N<sub>2</sub> adsorption-desorption isotherms, Fig. S2 the SEM images of both electrodes after cycling, Fig. S3 about the CV curves of both electrodes, Fig. S4 about the SEM images of three samples, Fig. S5 about electrolyte screening test, Fig. S6 about the GITT tests of three electrodes, Fig. S7 about the N1s of XPS pattern of electrodes at different states, Fig. S8 about the CV at 2 mV of full battery and Table S1 The performance comparison of different electrode.

---

\*Corresponding authors.

*E-mail addresses: jiangzhuwu@126.com; zhybattery@fjut.edu.cn*

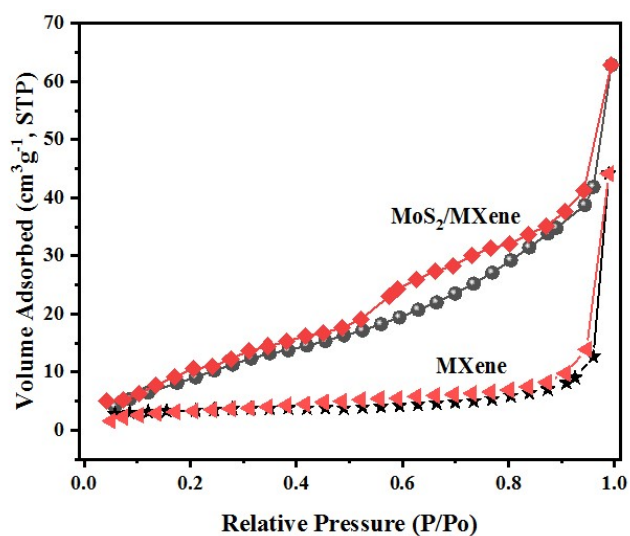

**Fig. S1.** The N<sub>2</sub> adsorption-desorption isotherms of MoS<sub>2</sub> and MoS<sub>2</sub>/MXene.

Fig. S1 shows the N<sub>2</sub> adsorption-desorption isotherms of MoS<sub>2</sub> and MoS<sub>2</sub>/MXene, of which the corresponding specific surface areas are 11.3 and 45 m<sup>2</sup>/g, respectively. This result further demonstrates that MoS<sub>2</sub>/MXene shows more excellent electrochemical performance.

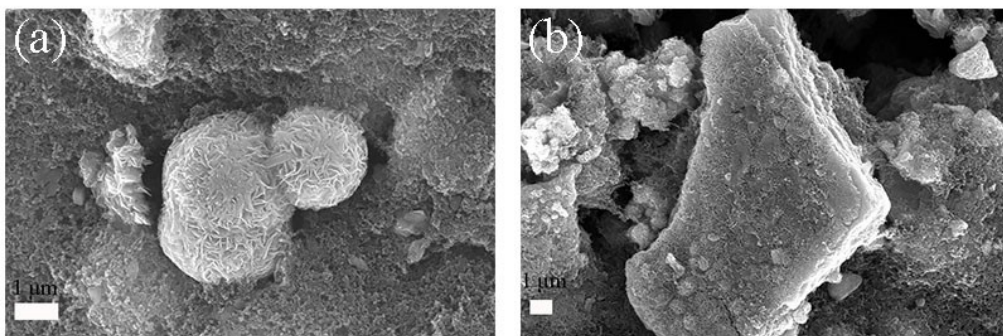

**Fig. S2.** The SEM images of MoS<sub>2</sub> and MoS<sub>2</sub>/MXene anodes after cycling.

Fig. S2 shows the SEM images of MoS<sub>2</sub> and MoS<sub>2</sub>/MXene anodes after 100 cycles at current density of 100 mA g<sup>-1</sup>. It can be found both of electrodes maintained the ball-flower morphology. And the composite maintains a better stable structure.

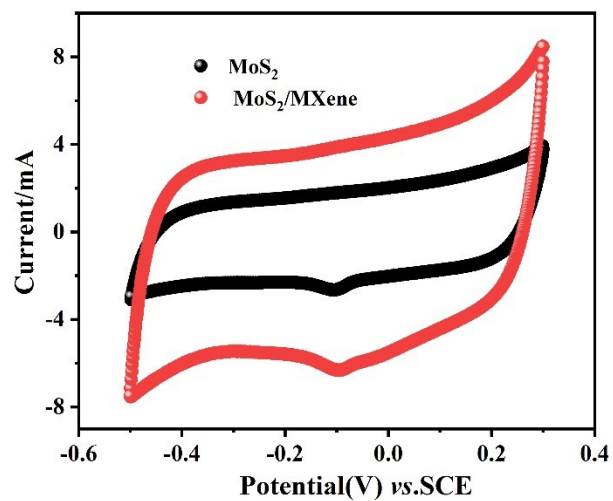

**Fig. S3.** The CV curves of MoS<sub>2</sub> and MoS<sub>2</sub>/MXene.

Fig. S3 shows the CV comparison of MoS<sub>2</sub> and MoS<sub>2</sub>/MXene, which exhibits the pseudocapacitance behavior. It is clearly found that MoS<sub>2</sub>/MXene displays better electrochemical properties than single MoS<sub>2</sub> in aqueous ammonium ion battery.

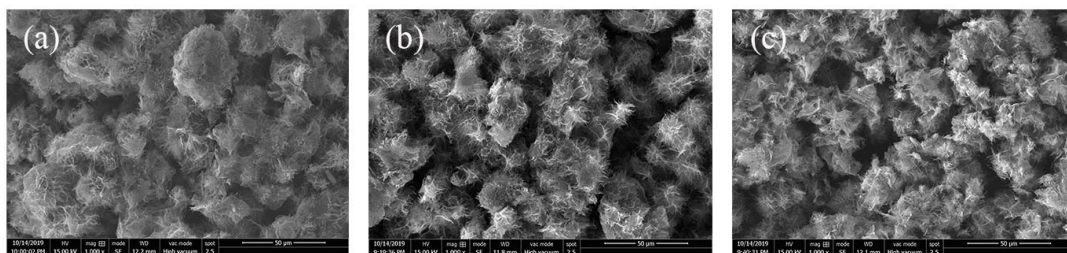

**Fig. S4.** SEM images of  $\text{NH}_4\text{V}_4\text{O}_{10}$  samples prepared at 140 °C (a), 160 °C (b), and 180 °C (c)

In the small magnification electron microscopy, we can clearly find that the single nanowire flower of  $\text{NH}_4\text{V}_4\text{O}_{10}$  sample become smaller with the increasing of preparation temperature.

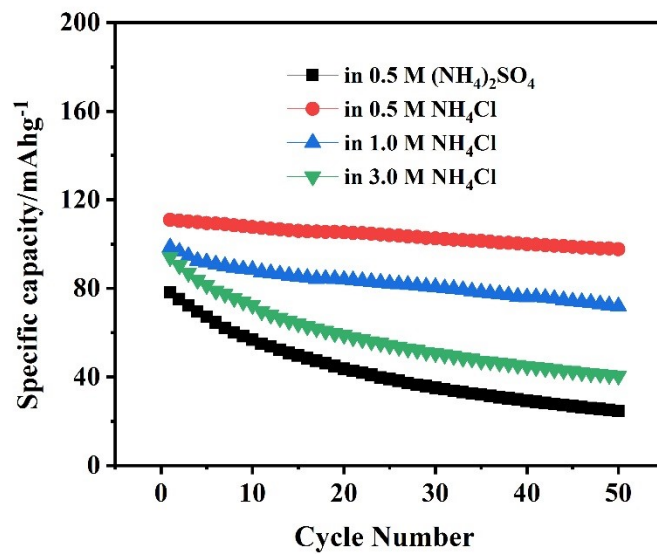

**Fig. S5.** The cycle performance of electrodes in different electrolytes.

It is clearly observed that the  $\text{NH}_4\text{V}_4\text{O}_{10}$  electrode in  $0.5 \text{ mol dm}^{-3} \text{ NH}_4\text{Cl}$  electrolyte exhibits the best cycle performance than other electrolytes.

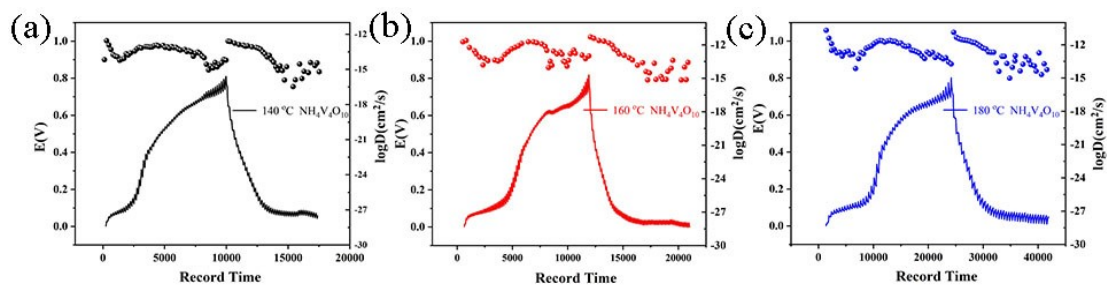

**Fig. S6.** The GITT tests of three electrodes

The GITT measurements of three electrodes are also tested in Fig. S6. It can be found that the average  $D$  value of electrode at  $180\text{ }^\circ\text{C}$  is larger than that of other electrodes, which demonstrates that the  $\text{NH}_4\text{V}_4\text{O}_{10}$  electrode at  $180\text{ }^\circ\text{C}$  shows the fast ammonium ion diffusion kinetics and it can exhibit excellent electrochemical properties.

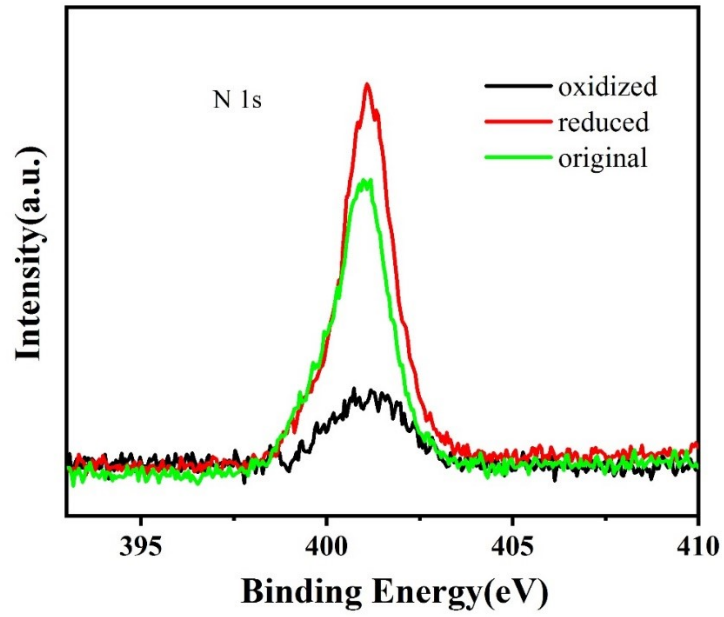

**Fig. S7.** The N1s of XPS pattern of electrodes at different states.

In Fig.S7, the intensity of N 1s peak for reduced electrode is higher than that of original and oxidized electrodes, indicating that lots of ammonium ions insert into the lattice of host material after the discharged process.



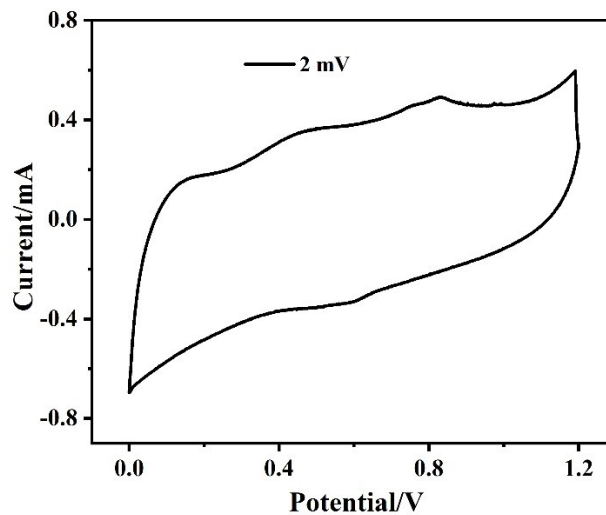

**Fig. S8.** The CV curve at  $2 \text{ mV s}^{-1}$  of full battery.

Fig. S8 shows the CV curve at  $\text{mV s}^{-1}$  for this aqueous ammonium ion battery based on  $\text{NH}_4\text{V}_4\text{O}_{10}$  as cathode and  $\text{MoS}_2/\text{MXene}$  as anode in  $0.5 \text{ mol dm}^{-3} \text{ NH}_4\text{Cl}$  electrolyte. The distinct redox peaks demonstrate that this full battery is successfully assembled.

Table S1 The performance comparison of different electrode in aqueous ammonium ion battery

| Electrodes of materials                                                             | Specific capacity of cathode                        | Specific capacity of anode                          | Specific capacity of full battery                | references |
|-------------------------------------------------------------------------------------|-----------------------------------------------------|-----------------------------------------------------|--------------------------------------------------|------------|
| Ni <sub>2</sub> Fe(CN) <sub>6</sub> -R                                              | 63.4 mAh g <sup>-1</sup> at 1C                      | —                                                   | —                                                | [S1]       |
| (NH <sub>4</sub> ) <sub>1.47</sub> Ni[Fe(CN) <sub>6</sub> ] <sub>0.88</sub> //PTCDI | 62.6 mAh g <sup>-1</sup> at 150 mA g <sup>-1</sup>  | 158.9 mAh g <sup>-1</sup> at 240 mA g <sup>-1</sup> | 41 mAh g <sup>-1</sup> at 60 mA g <sup>-1</sup>  | [S2]       |
| FeFe(CN) <sub>6</sub>                                                               | 76.1 mAh g <sup>-1</sup> at 30 mA g <sup>-1</sup>   | —                                                   | —                                                | [S3]       |
| MnHCF//PTCDI                                                                        | 104 mAh g <sup>-1</sup> at 100 mA g <sup>-1</sup>   | —                                                   | 45 mAh g <sup>-1</sup> at 15 mA g <sup>-1</sup>  | [S4]       |
| Na <sub>1.5</sub> Ni <sub>1.25</sub> Fe(CN) <sub>6</sub>                            | 56.1 mAh g <sup>-1</sup> at 1C                      | —                                                   | —                                                | [S5]       |
| MoO <sub>3</sub>                                                                    | 115 mAh g <sup>-1</sup> at 1C                       | —                                                   | —                                                | [S6]       |
| N-CuHCF                                                                             | 60 mAh g <sup>-1</sup> at 1C                        | —                                                   | —                                                | [S7]       |
| NH <sub>4</sub> V <sub>4</sub> O <sub>10</sub> -180°C //MoS <sub>2</sub> /MXene     | 126.6 mAh g <sup>-1</sup> at 100 mA g <sup>-1</sup> | 173.2 mAh g <sup>-1</sup> at 100 mA g <sup>-1</sup> | 42 mAh g <sup>-1</sup> at 100 mA g <sup>-1</sup> | Our work   |

[S1] H. Yu, J. Xu, C. Deng, M. Xia, X. Zhang, J. Shu, Z. Wang, The Nature of the Ultrahigh Initial Coulombic Efficiency of Ni<sub>2</sub>Fe(CN)<sub>6</sub> in Aqueous Ammonium-Ion Batteries, ACS Applied Energy Materials 4(9) (2021) 9594-9599.

[S2] X. Wu, Y. Qi, J.J. Hong, Z. Li, A.S. Hernandez, X. Ji, Rocking - chair ammonium - ion battery: a highly reversible aqueous energy storage system, Angewandte Chemie International Edition 56(42) (2017) 13026-13030.

[S3] S. Li, M. Xia, C. Xiao, X. Zhang, H. Yu, L. Zhang, J. Shu, Common ion effect enhanced Prussian blue analogues for aqueous ammonium ion storage, Dalton Transactions 50(19) (2021) 6520-6527.

- [S4] H. Zhang, Y. Tian, W. Wang, Z. Jian, W. Chen, Organic Ammonium Ion Battery: A New Strategy for Nonmetallic Ion Energy Storage System, *Angewandte Chemie* (2022).
- [S5] H. Yu, L. Fan, H. Yan, C. Deng, L. Yan, J. Shu, Z.-B. Wang, Nickel ferrocyanides for aqueous ammonium ion batteries, *Inorganic Chemistry Frontiers* 9(9) (2022) 2001-2010.
- [S6] G. Liang, Y. Wang, Z. Huang, F. Mo, X. Li, Q. Yang, D. Wang, H. Li, S. Chen, C. Zhi, Initiating hexagonal MoO<sub>3</sub> for superb - stable and fast NH<sub>4</sub><sup>+</sup> storage based on hydrogen bond chemistry, *Advanced Materials* 32(14) (2020) 1907802.
- [S7] X. Zhang, M. Xia, T. Liu, N. Peng, H. Yu, R. Zheng, L. Zhang, M. Shui, J. Shu, Copper hexacyanoferrate as ultra-high rate host for aqueous ammonium ion storage, *Chemical Engineering Journal* 421 (2021) 127767.
